# Supplementary material
Source: MDPI journal article supplement (https://www.mdpi.com/2076-3417/10/22/8004)
Supplement: s1 [file s1]

## Supplementary Materials

### Encapsulation of mRNA into artificial viral capsids via hybridization of a $\beta$ -annulus-dT<sub>20</sub> conjugate and the poly(A) tail of mRNA

Yoko Nakamura <sup>1</sup>, Yuki Sato <sup>1</sup>, Takashi Iwasaki <sup>3</sup>, Hiroshi Inaba <sup>1,2</sup> and Kazunori Matsuura <sup>1,2,\*</sup>

<sup>1</sup> Department of Chemistry and Biotechnology, Graduate School of Engineering, Tottori University, Tottori 680-8552, Japan.

<sup>2</sup> Centre for Research on Green Sustainable Chemistry, Tottori University, Tottori 680-8552, Japan.

<sup>3</sup> Department of Bioresources Science, Graduate School of Agricultural Sciences, Tottori University, Tottori 680-8553, Japan.

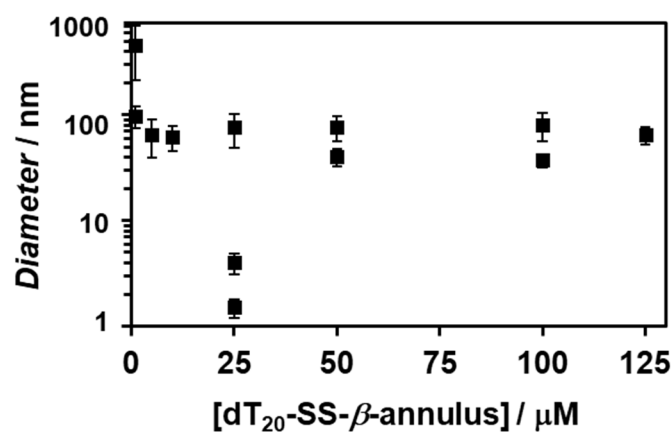

**Figure S1.** Concentration dependence of size distribution obtained from DLS for the aqueous solution of dT<sub>20</sub>-SS- $\beta$ -annulus in PBS (pH7.4) at 25°C.

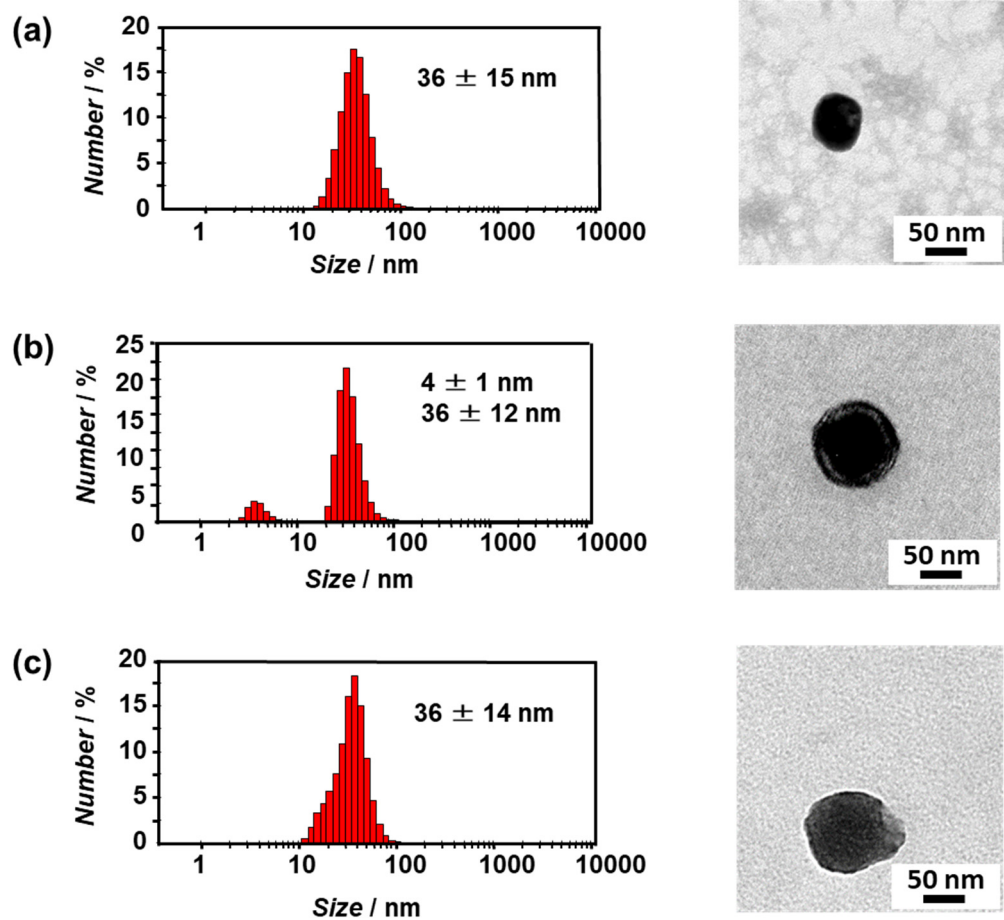

**Figure S2.** Size-distributions obtained from DLS and TEM images for co-assembly peptides (dT<sub>20</sub>-SS-β-annulus:β-annulus = 1:4.5 (a), 1:2 (b), and 1:1 (c) in water at 25°C.

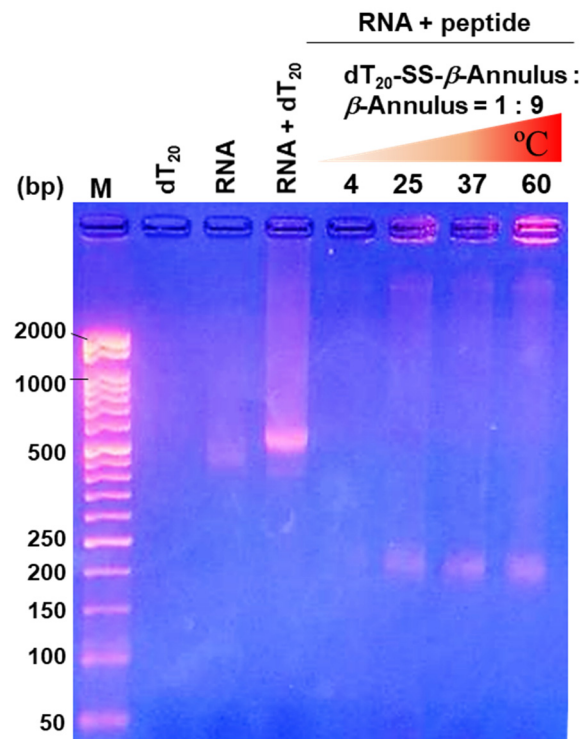

**Figure S3.** Gel shift assay obtained after hybridization of co-assembly peptides and mCherry mRNA in PBS (pH 7.4) incubated at various temperatures for 10-30 minutes. M : DNA marker.

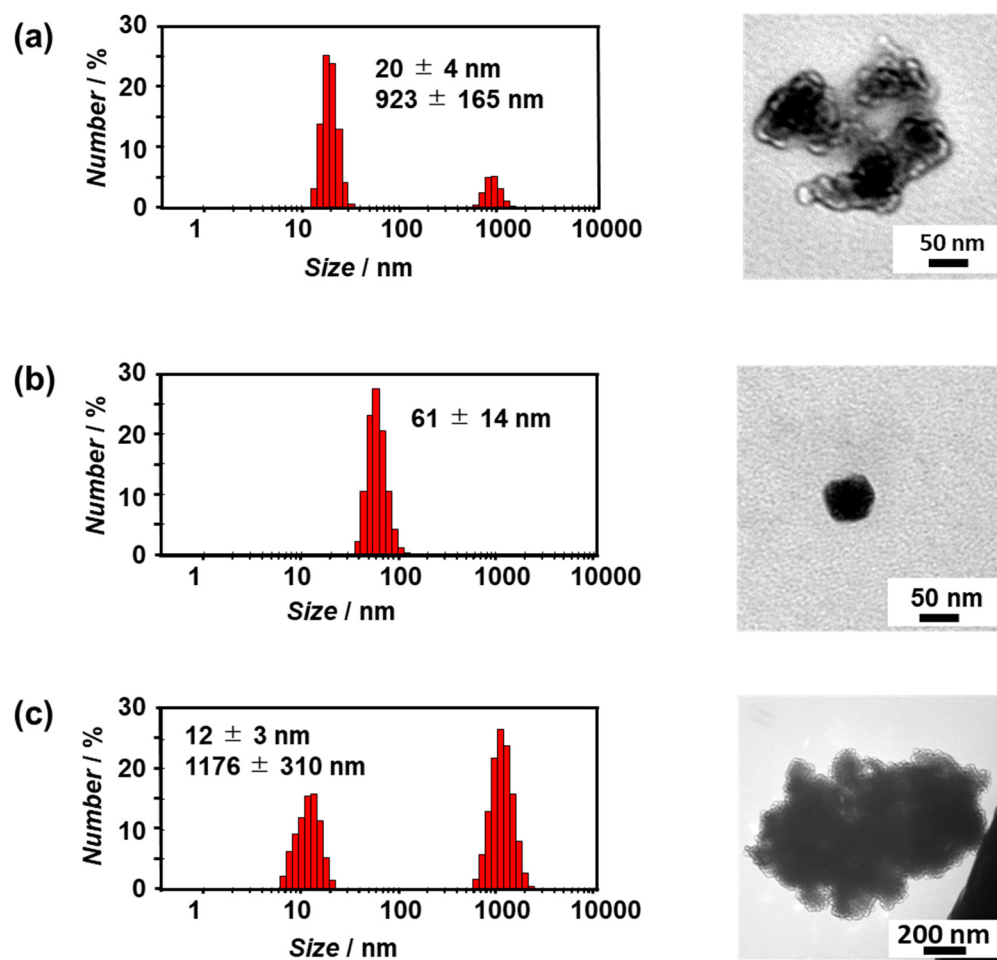

**Figure S4.** Size-distributions obtained from DLS and TEM images for co-assembly peptides (dT<sub>20</sub>-SS- $\beta$ -annulus; $\beta$ -annulus = 1:9) and mCherry mRNA in PBS buffer (pH 7.4) obtained after incubation at 4°C (a), 37°C (b) and 60°C (c) for 10-30 minutes.
